# Supplementary material for: Evaluation of diagnostic performance of non-invasive HIV self-testing kit using oral fluid in Addis Ababa, Ethiopia: A facility-based cross-sectional study
Source: PLOS journal article supplement (doi:10.1371/journal.pone.0210866), 2019-01-25
Supplement: S1 (10.1371/journal.pone.0210866.s001) [file journal.pone.0210866.s001]

Questionnaire to assess performance of OraQuick for diagnosis of HIV among clients attending VCT/PICT and ART clinics in Addis Ababa

Code No \_\_\_\_\_

**A. Demographics**

1. Age \_\_\_\_\_
2. Sex \_\_\_\_\_
3. Educational status A. Illiterate      B. Elementary      C. Secondary D. College/University
4. Residence: A. Urban                      B. Rural
5. Religion      A. Orthodox B. Muslim C. Protestant D. Other/specify \_\_\_\_\_
6. Marital Status: A. Married B. never married      C. Divorced/separated D. Widowed
7. Occupation A. Government employee B. Housewife C. Student D. Merchant E. daily laborer F. Farmer G. driver      F. Other/Specify \_\_\_\_\_
8. Monthly in come \_\_\_\_\_

**B. Explanatory variables**

| Variables                                                                    | Yes | No |
|------------------------------------------------------------------------------|-----|----|
| History of blood transfusion                                                 |     |    |
| Tooth/body tattooing                                                         |     |    |
| History of unsafe injection                                                  |     |    |
| History of tooth extraction                                                  |     |    |
| History of surgery                                                           |     |    |
| History of sharing sharp objects (Needles, razor blade etc)                  |     |    |
| History of treatment for liver diseases                                      |     |    |
| Do you have family member infected/treated for HBV/HCV                       |     |    |
| History of treatment for STIs (syphilis, gonorrhea, chancroid, etc).         |     |    |
| Alcohol use                                                                  |     |    |
| Multiple life time sexual partner (please indicate the number, if yes) _____ |     |    |
